# Supplementary material for: NfL reliability across laboratories, stage-dependent diagnostic performance and matrix comparability in genetic FTD: a large GENFI study
Source: PubMed Central journal article supplement (PMC11347244; doi:10.1136/jnnp-2023-332464), 2024-01-19
Supplement: jnnp-2023-332464supp001.pdf [file jnnp-2023-332464supp001.pdf]

Supplementary Figures

Cross-lab reliability for each genotype

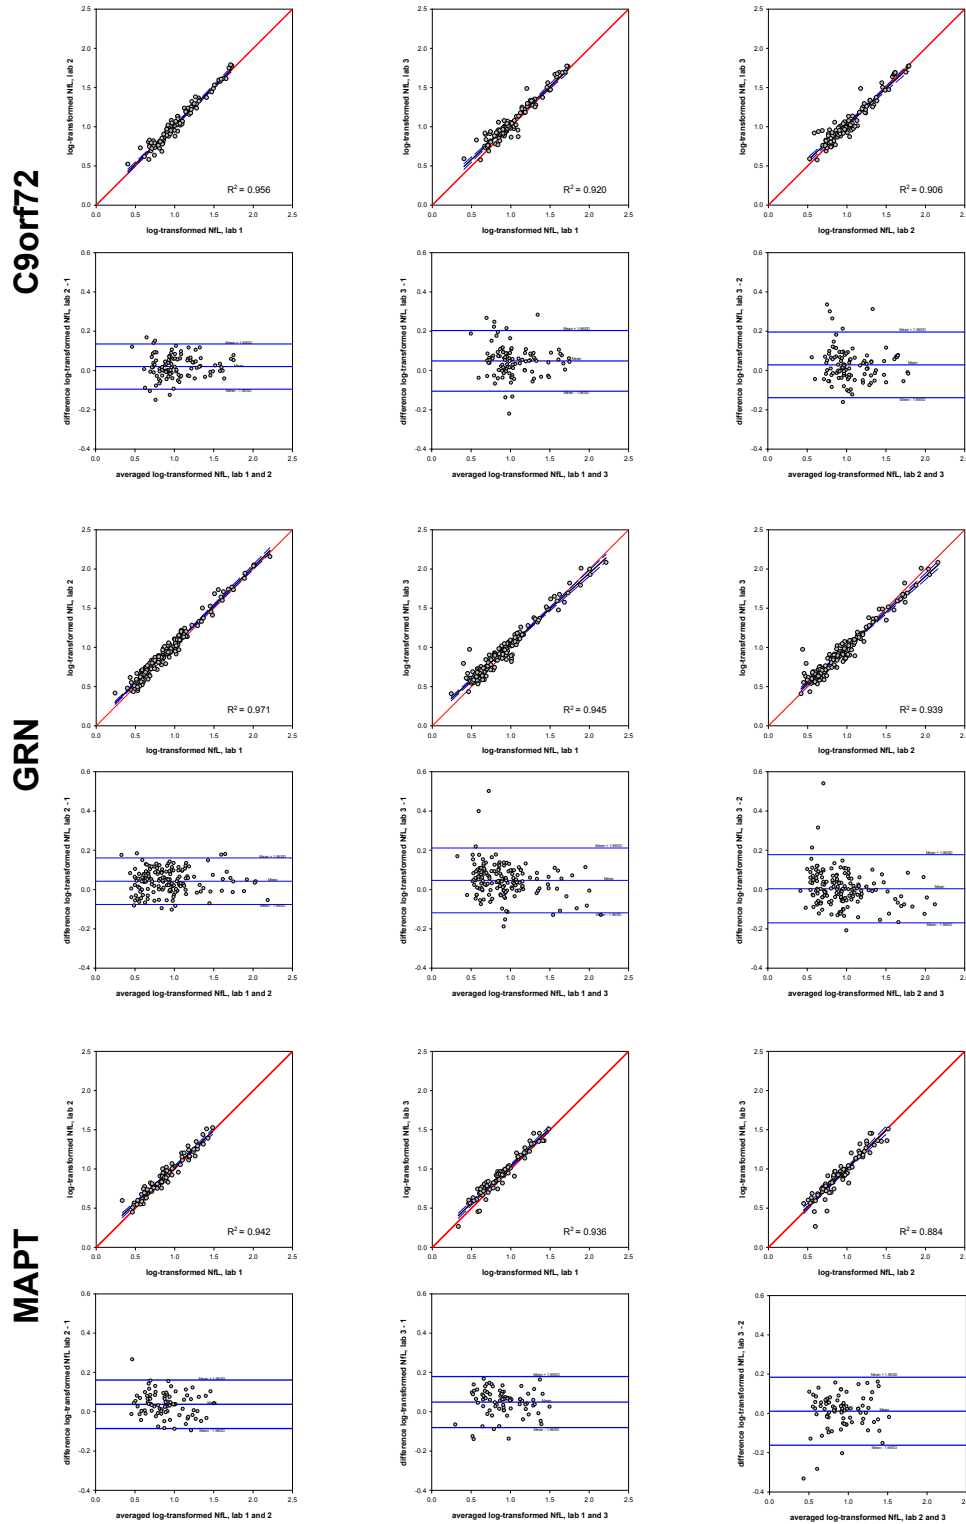

Supplementary Figure 1: Cross-lab reliability for each genotype (*C9orf72*, *GRN*, and *MAPT*) of blood NfL measurements in genetic FTD (gFTD) across three labs (lab 1 and 2 serum, lab 3 plasma) - linear regressions and Bland-Altman analyses of log-transformed NfL values. For detailed statistics see Supplementary Table 3.

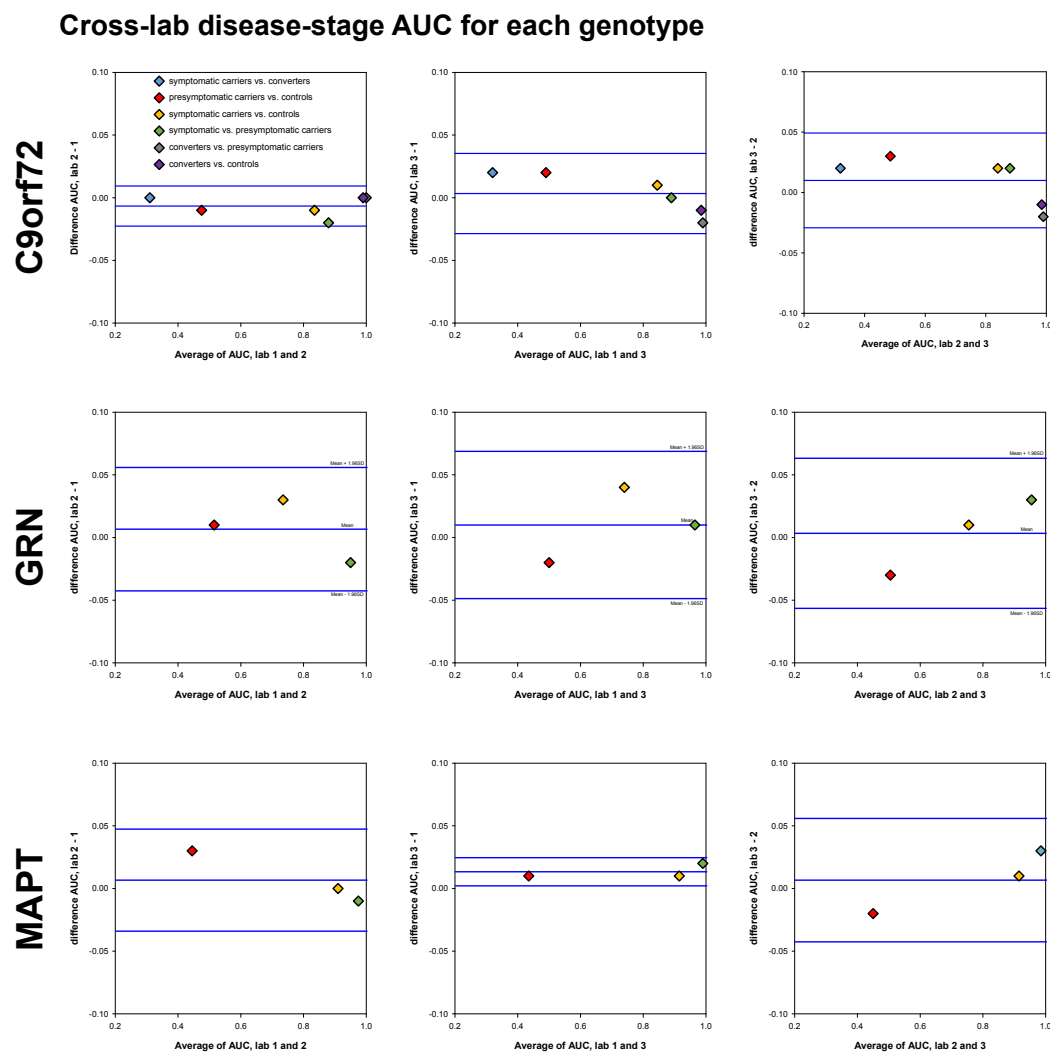

Supplementary Figure 2: Cross-lab disease stage AUC for each genotype (*C9orf72*, *GRN*, and *MAPT*) of blood NfL measurements in genetic FTD (gFTD) across three labs - Bland-Altman analyses of disease stage AUC. For detailed statistics see Supplementary Table 4. An analysis for the converters was performed for *C9orf72*, but not for *GRN* and *MAPT* due to the sample size (see cohort characteristics in Supplementary Table 1).

## Supplementary Tables

| Group                   | Subjects | Subjects with longitudinal samples | Male sex | Age (years)        | Disease onset (years) |
|-------------------------|----------|------------------------------------|----------|--------------------|-----------------------|
| Presymptomatic          | 66       | 57                                 | 42       | 41 (34.00 – 49.38) | n.a.                  |
| – C9orf72               | 22       | 17                                 | 14       | 42 (35.04 – 48.88) | n.a.                  |
| – GRN                   | 29       | 28                                 | 16       | 43 (34.97 – 52.62) | n.a.                  |
| – MAPT                  | 15       | 12                                 | 12       | 36 (32.17 – 46.44) | n.a.                  |
| Converter               | 4        | 4                                  | 1        | 65 (59.72 – 67.53) | n.a.                  |
| – C9orf72               | 3        | 3                                  | 1        | 63 (56.89 – 65.00) | n.a.                  |
| – GRN                   | 1        | 1                                  | 0        | 68                 | n.a.                  |
| Symptomatic             | 21       | 18                                 | 8        | 63 (59.29 – 66.23) | 56 (53.00 – 60.00)    |
| – C9orf72               | 7        | 6                                  | 1        | 66 (64.17 – 71.66) | 57 (51.50 – 61.50)    |
| – GRN                   | 8        | 7                                  | 4        | 61 (59.67 – 66.03) | 58 (54.75 – 58.50)    |
| – MAPT                  | 6        | 5                                  | 3        | 61 (58.30 – 64.51) | 54 (52.25 – 55.50)    |
| Controls (non-carriers) | 60       | 53                                 | 34       | 45 (37.52 – 55.74) |                       |

Supplementary Table 1. Cohort characteristics at baseline. Data are reported as median and interquartile range. N.a.: not applicable.

| A.                                 |                 |                 |                 |  |
|------------------------------------|-----------------|-----------------|-----------------|--|
|                                    | Lab 1 vs. lab 2 | Lab 1 vs. lab 3 | Lab 2 vs. lab 3 |  |
| Bias                               | 1.08            | 1.12            | 1.03            |  |
| Std Dev                            | 1.15            | 1.20            | 1.22            |  |
| Limits of Agreement                | 0.82, 1.43      | 0.78, 1.59      | 0.69, 1.53      |  |
| Bias CI 95% CI                     | 1.07 to 1.10    | 1.10 to 1.14    | 1.01 to 1.05    |  |
| Lower Limit of Agreement CI 95% CI | 0.80 to 0.84    | 0.76 to 0.81    | 0.67 to 0.72    |  |
| Upper Limit of Agreement CI 95% CI | 1.39 to 1.47    | 1.54 to 1.64    | 1.48 to 1.59    |  |
| B.                                 |                 |                 |                 |  |
| Bias                               | -0.1            | 0.00            | 0.01            |  |
| Std Dev                            | 0.01            | 0.01            | 0.01            |  |
| Limits of Agreement                | -0.21, to 0.01  | -0.07, to 0.01  | -0.01, to 0.03  |  |
| Bias CI 95% CI                     | -0.01 to 0.00   | -0.00 to 0.01   | -0.00 to 0.02   |  |
| Lower Limit of Agreement CI 95% CI | -0.04 to -0.01  | -0.02 to 0.00   | -0.03 to 0.01   |  |
| Upper Limit of Agreement CI 95% CI | -0.01 to 0.03   | 0.00 to 0.02    | 0.01 to 0.05    |  |

Supplementary Table 2. Numerical results of the Bland-Altman analysis comparing blood NfL measurements in genetic FTD across three labs (lab 1 and 2 serum, lab 3 plasma) (A: see Figure 1A; B: see Figure 1C). Data are given as pg/ml.

| C9orf72 |                                    |                 |                 |                 |
|---------|------------------------------------|-----------------|-----------------|-----------------|
|         |                                    | Lab 1 vs. lab 2 | Lab 1 vs. lab 3 | Lab 2 vs. lab 3 |
|         | Bias                               | 1.58            | 1.12            | 1.07            |
|         | Std Dev                            | 1.15            | 1.20            | 1.23            |
|         | Limits of Agreement                | 0.11, 1.38      | 0.78, 1.58      | 0.72, 1.58      |
|         | Bias CI 95% CI                     | 1.02 to 1.07    | 1.07 to 1.15    | 1.02 to 1.12    |
|         | Lower Limit of Agreement CI 95% CI | 0.76 to 0.83    | 0.74 to 0.83    | 0.68 to 0.78    |
|         | Upper Limit of Agreement CI 95% CI | 1.32 to 1.45    | 1.51 to 1.70    | 1.48 to 1.70    |
| GRN     |                                    |                 |                 |                 |
|         | Bias                               | 1.10            | 1.12            | 1.00            |
|         | Std Dev                            | 1.15            | 1.20            | 1.23            |
|         | Limits of Agreement                | 0.83, 1.45      | 0.76, 1.62      | 0.68, 1.51      |
|         | Bias CI 95% CI                     | 1.07 to 1.12    | 1.07, to 1.14   | 0.98 to 1.05    |
|         | Lower Limit of Agreement CI 95% CI | 0.81 to 0.87    | 0.72 to 0.79    | 0.63 to 0.71    |
|         | Upper Limit of Agreement CI 95% CI | 1.38 to 1.51    | 1.55 to 1.70    | 1.41 to 1.58    |
| MAPT    |                                    |                 |                 |                 |
|         | Bias                               | 1.10            | 1.12            | 1.02            |
|         | Std Dev                            | 1.15            | 1.17            | 1.23            |
|         | Limits of Agreement                | 0.81, 1.45      | 0.83, 1.51      | 0.69, 1.55      |
|         | Bias CI 95% CI                     | 1.05 to 1.12    | 1.07 to 1.15    | 0.98 to 1.07    |
|         | Lower Limit of Agreement CI 95% CI | 0.78 to 0.87    | 0.78 to 0.87    | 0.63 to 0.74    |
|         | Upper Limit of Agreement CI 95% CI | 1.38 to 1.55    | 1.41 to 1.62    | 1.41 to 1.66    |

Supplementary Table 3. Numerical values of Bland-Altman analysis for cross-lab reliability for each genotype (see supplementary figure 1). Data are given as pg/ml.

| C9orf72 |                                    |                 |                 |                 |
|---------|------------------------------------|-----------------|-----------------|-----------------|
|         |                                    | Lab 1 vs. lab 2 | Lab 1 vs. lab 3 | Lab 2 vs. lab 3 |
|         | Bias                               | -0.07           | 0.03            | 0.01            |
|         | Std Dev                            | 0.01            | 0.02            | 0.02            |
|         | Limits of Agreement                | -0.02, 0.01     | -0.03, 0.04     | -0.03, 0.05     |
|         | Bias CI 95% CI                     | -0.02 to 0.00   | -0.02 to 0.02   | -0.01 to 0.03   |
|         | Lower Limit of Agreement CI 95% CI | -0.04 to -0.01  | -0.06 to 0.00   | -0.07 to 0.01   |
|         | Upper Limit of Agreement CI 95% CI | -0.01 to 0.03   | 0.00 to 0.07    | 0.01 to 0.09    |
| GRN     |                                    |                 |                 |                 |
|         | Bias                               | 0.01            | 0.01            | 0.00            |
|         | Std Dev                            | 0.03            | 0.03            | 0.03            |
|         | Limits of Agreement                | -0.04, 0.06     | -0.05, 0.07     | -0.06, 0.06     |
|         | Bias CI 95% CI                     | -0.18 to 0.20   | -0.21, to 0.23  | -0.22 to 0.23   |
|         | Lower Limit of Agreement CI 95% CI | -0.36 to 0.28   | -0.43 to 0.33   | -0.44 to 0.33   |
|         | Upper Limit of Agreement CI 95% CI | -0.26 to 0.38   | -0.31 to 0.45   | -0.33 to 0.45   |
| MAPT    |                                    |                 |                 |                 |
|         | Bias                               | 0.01            | 0.01            | 0.01            |
|         | Std Dev                            | 0.02            | 0.06            | 0.03            |
|         | Limits of Agreement                | -0.03, 0.05     | 0.00, 0.02      | -0.04, 0.06     |
|         | Bias CI 95% CI                     | -0.15 to 0.16   | -0.03 to 0.06   | -0.18 to 0.20   |
|         | Lower Limit of Agreement CI 95% CI | -0.30 to 0.23   | -0.07 to 0.08   | -0.36 to 0.28   |
|         | Upper Limit of Agreement CI 95% CI | -0.22 to 0.31   | -0.05 to 0.10   | -0.26 to 0.38   |

Supplementary Table 4. Numerical values of Bland-Altman analysis for cross-lab disease-stage AUC for each genotype (see supplementary figure 2). Data are given as pg/ml.
